# Supplementary material
Source: PubMed Central journal article supplement (PMC4799500)
Supplement: supp_fj.15-280313_Supplemental_Figures1.pdf [file supp_fj.15-280313_Supplemental_Figures1.pdf]

## Supplemental Figure 1

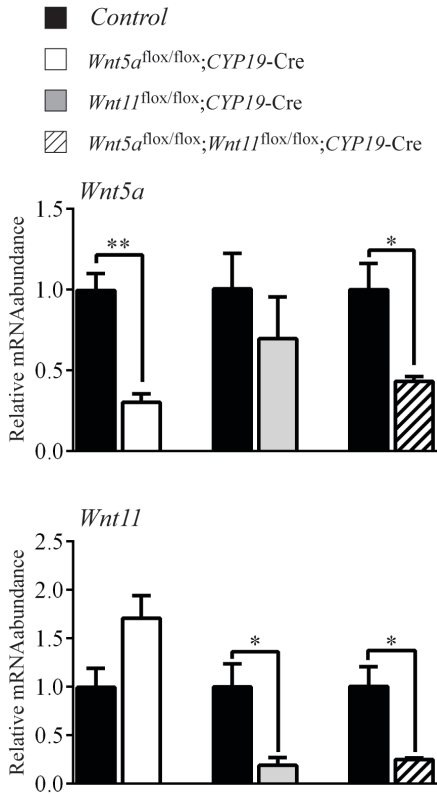

**Figure S1 (left):** *Wnt5a* and *Wnt11* knockdown efficiency in the conditional knockout models. Expression of *Wnt5a* and *Wnt11* was determined by RT-qPCR in granulosa cells isolated from immature, eCG treated mice of the indicated genotypes. Expression of each transcript was normalized to the housekeeping gene *Rpl19*. Control = corresponding genotype lacking the *CYP19*-cre transgene. Values for each experimental genotype are expressed relative to their corresponding control. n=4 animals per genotype, columns = means, error bars = SEM, \* = values are statistically different (P<0.05), \*\* = values are statistically different (P<0.01).

## Supplemental Figure 2

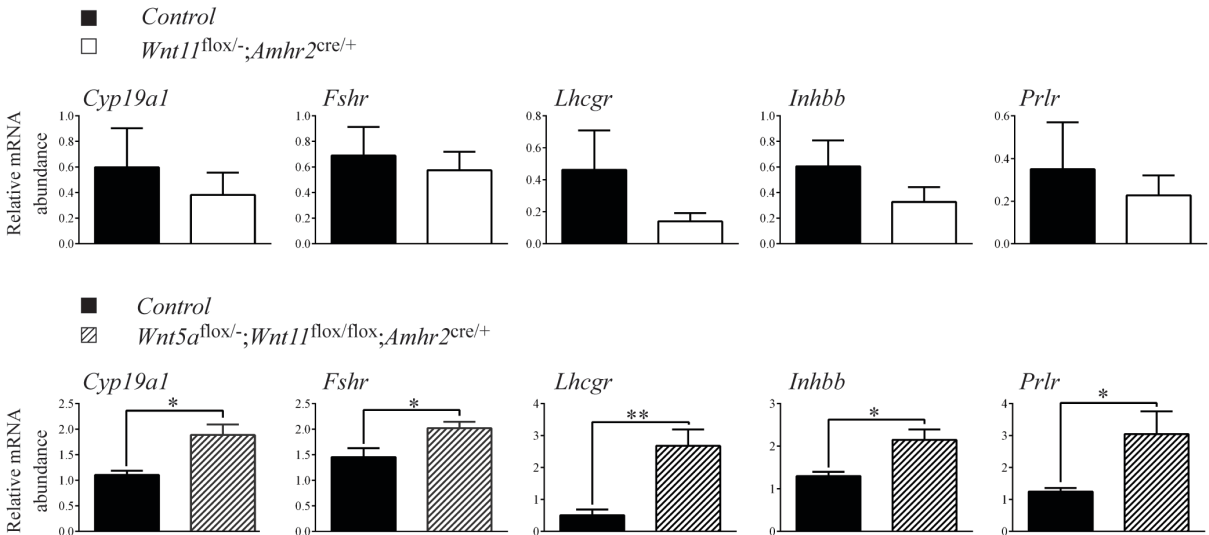

**Figure S2 (above).** Expression of WNT5a target genes in *Wnt11<sup>flox/-</sup>;Amhr2<sup>cre/+</sup>* and *Wnt5a<sup>flox/-</sup>;Wnt11<sup>flox/flox</sup>;Amhr2<sup>cre/+</sup>* mice. RT-qPCR analysis of the indicated genes was done on granulosa cell samples collected from immature mice 48h after eCG treatment (n=4 animals/genotype). All data were normalized to the housekeeping gene *Rpl19*. Control = corresponding genotype lacking the *Amhr2<sup>cre</sup>* allele. Columns = means, error bars = SEM, asterisks indicate a statistically significant (\*: P<0.05, \*\*: P<0.01) difference vs control.

### Supplemental Figure 3

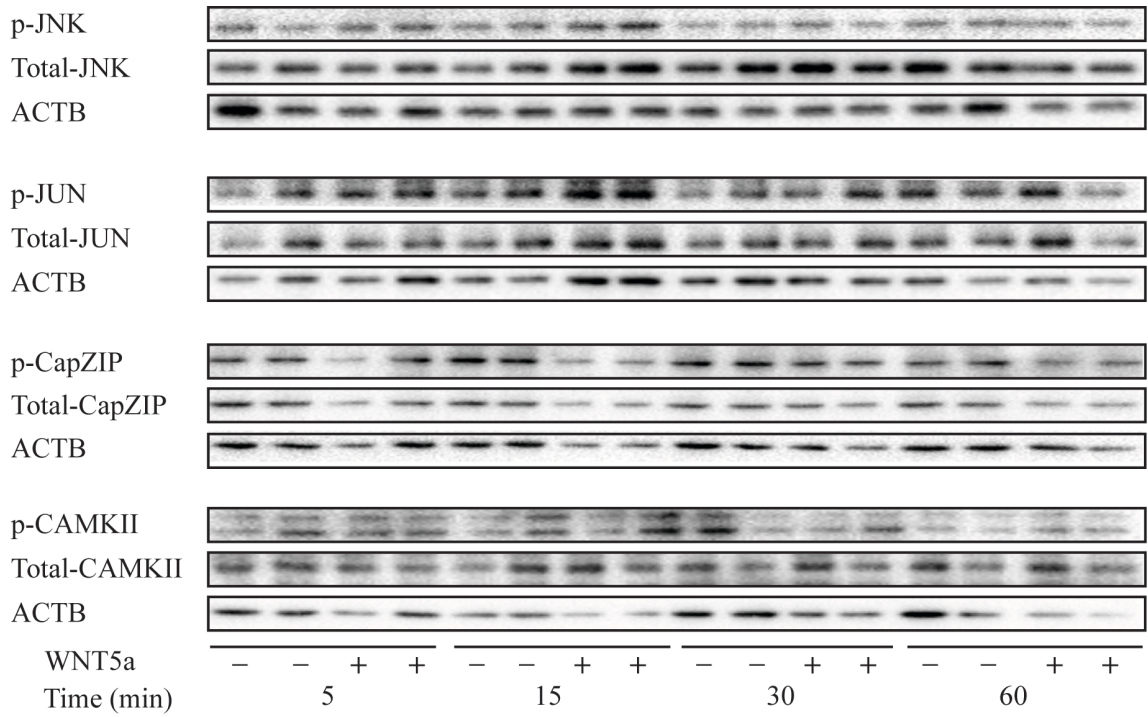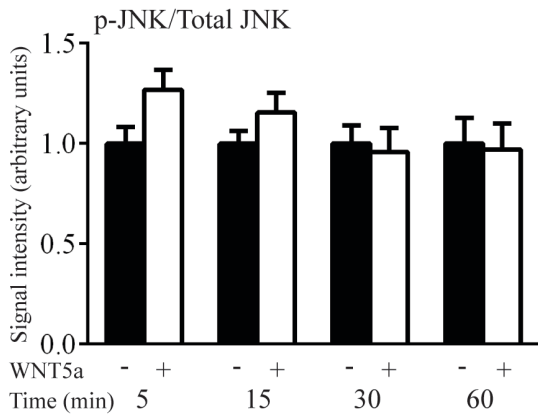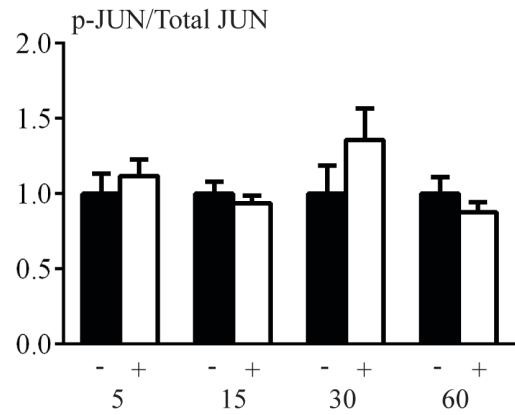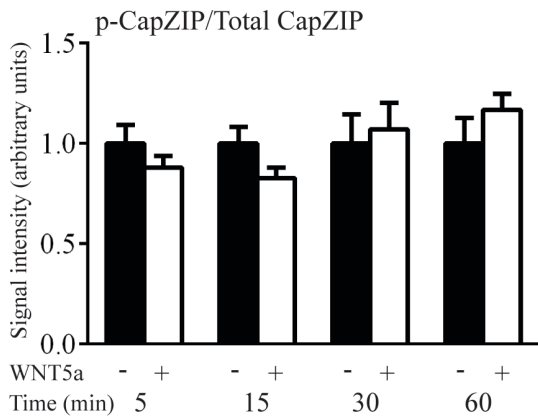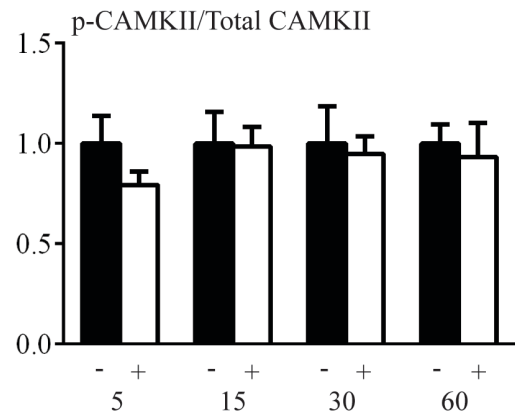

**Figure S3 (previous page).** WNT5a does not regulate non-canonical signaling effectors in granulosa cells. Primary cultured granulosa cells were treated or not with WNT5a (3.5  $\mu\text{g/ml}$ ) for the indicated times, and the expression of the indicated proteins and phosphoproteins was studied by immunoblotting. Representative immunoblots showing 2 samples/treatment and time are shown in the upper panels, quantitative analyses of 4 samples/treatment and time are shown in the graphs. Columns = means, error bars = SEM, values for the WNT5a treated groups are expressed relative to their corresponding controls at each time point.

Supplemental Figure 4

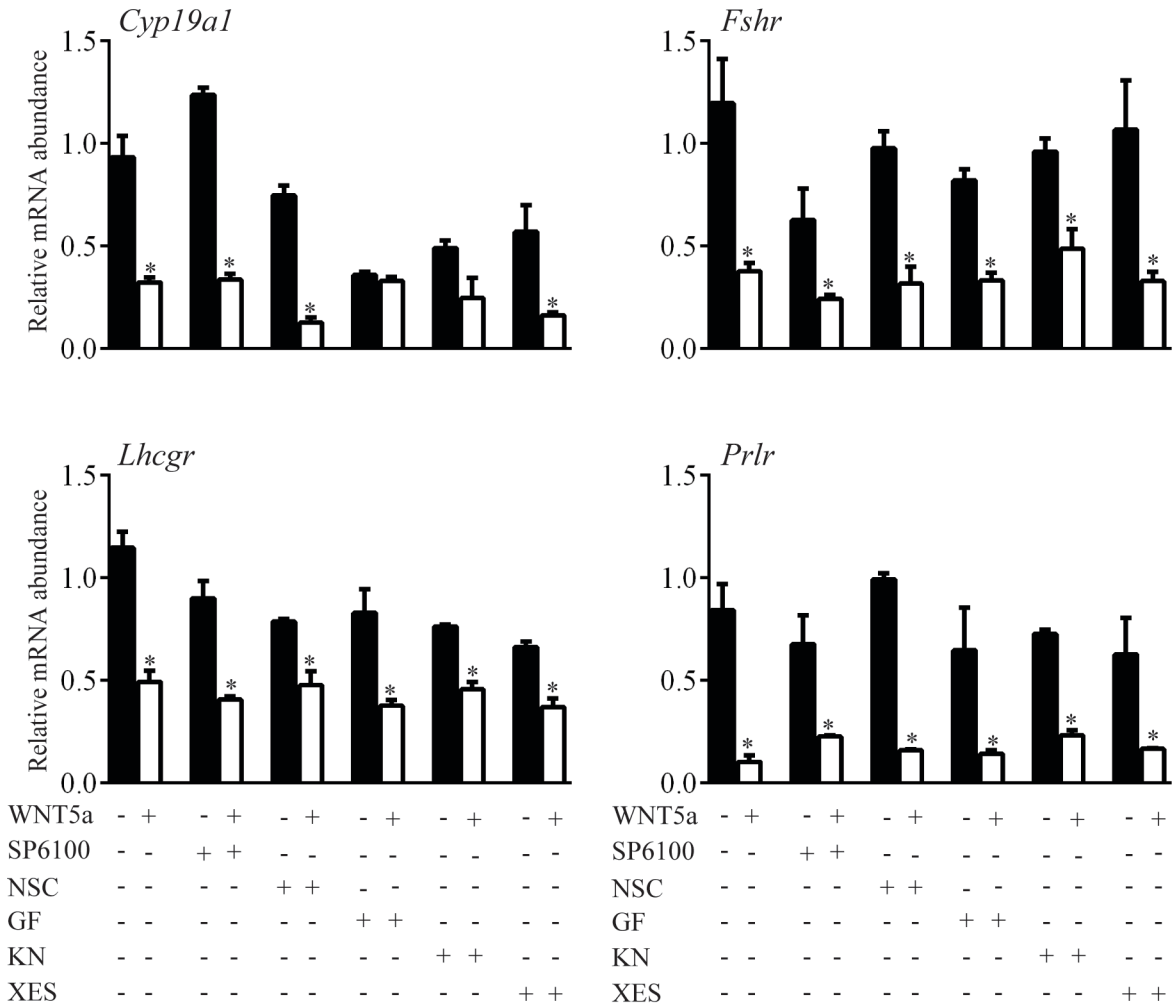

**Figure S4.** Inhibition of noncanonical signaling does not prevent WNT5a-mediated suppression of its target genes. Primary cultured granulosa cells were treated with WNT5a (3.5  $\mu\text{g/ml}$ ) for 15 minutes, with or without pretreatment with the inhibitors SP600125 (SP6), NSC23766 (NSC), GF109203X (GF), KN-93 (KN) or Xestrospongins C (Xes), and the mRNA levels of the indicated WNT5a target genes were studied by RT-qPCR. Expression of each transcript was normalized to the housekeeping gene *Rpl19*, n = 4 samples/treatment. Columns = means, error bars = SEM, asterisks (\*) indicate a statistically significant difference vs control, P < 0.05.
